# Supplementary material
Source: MDPI journal article supplement (https://www.mdpi.com/2071-1050/13/18/10410)
Supplement: s1 [file s1 › sustainability-1300744-supplementary.pdf]

# Experts Survey on Constructed Wetlands (AHP)

Constructed wetlands are green infrastructures, example of nature-based solutions which has sustainable ecological services providing supporting, provisioning, regulating and cultural services. These services were possible through the comprehensive efficiency evaluation of the constructed wetland. However, the efficiency evaluation of constructed wetlands has been very limited, and only water treatment efficiency have been considered. Therefore, the results of this survey will be used to derive a comprehensive efficiency evaluation index for evaluating the efficiency of an constructed wetland. For this evaluation, objective items were decided after consulting experts in each field, and prioritized and weighted each index, taking into consideration the importance of each item. The comprehensive efficiency evaluation for constructed wetlands in the future is conducted for future use. Your cooperation and response is very much appreciated.

## Analytic Hierarchy Process

AHP(Analytic Hierarchy Process) stratifies a given decision-making problem and compares each element in the immediate lower layer from the viewpoint of an element in the upper layer to obtain the relative importance or weight using pairwise comparison.

### [Method of Comparison]

Compare the two evaluation items by checking (✓) depending on the importance relative to each other

When comparing 'Item 1' and 'Item 2', select which is more important. If 'Item 1' is more important, please select the degree of importance in 'Item 1' (left part), and if 'Item 2' is more important, please select the degree of importance from the 'Item 2' (right part). The circled numbers indicate the importance of each item. If the items are equally important, you can check '① or equally important'.

| Evaluation item | Importance |   |   |   |   |   |   |   | Equal ly Impo rtant | Importance |   |   |   |   |   |   |   | Evaluation item |
|-----------------|------------|---|---|---|---|---|---|---|---------------------|------------|---|---|---|---|---|---|---|-----------------|
| 평가항목1           | ⑨          | ✓ | ⑦ | ⑥ | ⑤ | ④ | ③ | ② | ①                   | ②          | ③ | ④ | ⑤ | ⑥ | ⑦ | ⑧ | ⑨ | 평가항목2           |

□ Constructed wetland evaluation indices

| Index                                                      | Item                        | Sub-indices                                                                                        |
|------------------------------------------------------------|-----------------------------|----------------------------------------------------------------------------------------------------|
| Treatment efficiency<br>(2 items)                          | Water purification          | SS, BOD, COD, TN, TP, etc.                                                                         |
|                                                            | Flow regulation             | Ease of inflow and outflow, stagnation, etc.                                                       |
| Cultural efficiency<br>(2 items)                           | Accessibility to the public | Adequate parking lots, proximity to roads, proximity to cities and residential areas               |
|                                                            | Social benefits             | Trails, utilities and recreational facilities (i.e. rest areas, sports facilities, restrooms, etc) |
| Ecological efficiency<br>(3 items)                         | Algal bloom                 | Status of green algae occurrence                                                                   |
|                                                            | Aquatic habitat             | Fish habitat, other living organisms (i.e. plants, benthic organisms, etc)                         |
|                                                            | Terrestrial ecosystem       | Plants, terrestrial and aerial animals                                                             |
| Operation and landscape management efficiency<br>(5 items) | Slope protection            | Slope erosion, embankment protection, etc.                                                         |
|                                                            | Plant management            | Removal of dead plants, landscaping and water management, weed control, etc.                       |
|                                                            | Sediment/waste management   | Sediment management, soil dredging, waste management                                               |
|                                                            | Facility maintenance        | Deck management, trail maintenance, amusement facilities management, etc.                          |
|                                                            | Odor control                | Occurrence of foul odor                                                                            |

# 1 Evaluation of Relative importance of Constructed Wetland Indices

| Index                                         | Item                        | Sub-indices                                                                                        |
|-----------------------------------------------|-----------------------------|----------------------------------------------------------------------------------------------------|
| Treatment efficiency                          | Water purification          | SS, BOD, COD, TN, TP, etc.                                                                         |
|                                               | Flow regulation             | Ease of inflow and outflow, stagnation, etc.                                                       |
| Cultural efficiency                           | Accessibility to the public | Adequate parking lots, proximity to roads, proximity to cities and residential areas               |
|                                               | Social benefits             | Trails, utilities and recreational facilities (i.e. rest areas, sports facilities, restrooms, etc) |
| Ecological efficiency                         | Algal bloom                 | Status of green algae occurrence                                                                   |
|                                               | Aquatic habitat             | Fish habitat, other living organisms (i.e. plants, benthic organisms, etc)                         |
|                                               | Terrestrial ecosystem       | Plants, terrestrial and aerial animals                                                             |
| Operation and landscape management efficiency | Slope protection            | Slope erosion, embankment protection, etc.                                                         |
|                                               | Plant management            | Removal of dead plants, landscaping and water management, weed control, etc.                       |
|                                               | Sediment/waste management   | Sediment management, soil dredging, waste management                                               |
|                                               | Facility maintenance        | Deck management, trail maintenance, amusement facilities management, etc.                          |
|                                               | Odor control                | Occurrence of foul odor                                                                            |

☐ Compare the two evaluation items by checking (✓) depending on the importance relative to each other

| Evaluation item       | Importance |   |   |   |   |   |   |   | Equally Important | Importance |   |   |   |   |   |   |   | Evaluation item                               |
|-----------------------|------------|---|---|---|---|---|---|---|-------------------|------------|---|---|---|---|---|---|---|-----------------------------------------------|
| Treatment efficiency  | ⑨          | ⑧ | ⑦ | ⑥ | ⑤ | ④ | ③ | ② | ①                 | ②          | ③ | ④ | ⑤ | ⑥ | ⑦ | ⑧ | ⑨ | Cultural efficiency                           |
| Treatment efficiency  | ⑨          | ⑧ | ⑦ | ⑥ | ⑤ | ④ | ③ | ② | ①                 | ②          | ③ | ④ | ⑤ | ⑥ | ⑦ | ⑧ | ⑨ | Ecological efficiency                         |
| Treatment efficiency  | ⑨          | ⑧ | ⑦ | ⑥ | ⑤ | ④ | ③ | ② | ①                 | ②          | ③ | ④ | ⑤ | ⑥ | ⑦ | ⑧ | ⑨ | Operation and landscape management efficiency |
| Cultural efficiency   | ⑨          | ⑧ | ⑦ | ⑥ | ⑤ | ④ | ③ | ② | ①                 | ②          | ③ | ④ | ⑤ | ⑥ | ⑦ | ⑧ | ⑨ | Ecological efficiency                         |
| Cultural efficiency   | ⑨          | ⑧ | ⑦ | ⑥ | ⑤ | ④ | ③ | ② | ①                 | ②          | ③ | ④ | ⑤ | ⑥ | ⑦ | ⑧ | ⑨ | Operation and landscape management efficiency |
| Ecological efficiency | ⑨          | ⑧ | ⑦ | ⑥ | ⑤ | ④ | ③ | ② | ①                 | ②          | ③ | ④ | ⑤ | ⑥ | ⑦ | ⑧ | ⑨ | Operation and landscape management efficiency |

## 2 Evaluation of relative importance of sub indices for Treatment efficiency

| Index                | Item               | Sub-indices                                  |
|----------------------|--------------------|----------------------------------------------|
| Treatment efficiency | Water purification | SS, BOD, COD, TN, TP, etc.                   |
|                      | Flow regulation    | Ease of inflow and outflow, stagnation, etc. |

☐ Compare the two evaluation items by checking (✓) depending on the importance relative to each other

| Evaluation item    | Importance |   |   |   |   |   |   |   |   | Equally Important | Importance |   |   |   |   |   |   |   |  | Evaluation item |
|--------------------|------------|---|---|---|---|---|---|---|---|-------------------|------------|---|---|---|---|---|---|---|--|-----------------|
| Water purification | ⑨          | ⑧ | ⑦ | ⑥ | ⑤ | ④ | ③ | ② | ① |                   | ②          | ③ | ④ | ⑤ | ⑥ | ⑦ | ⑧ | ⑨ |  | Flow regulation |

## 3 Evaluation of relative importance of sub indices for Cultural efficiency

| Index               | Item                        | Sub-indices                                                                                        |
|---------------------|-----------------------------|----------------------------------------------------------------------------------------------------|
| Cultural efficiency | Accessibility to the public | Adequate parking lots, proximity to roads, proximity to cities and residential areas               |
|                     | Social benefits             | Trails, utilities and recreational facilities (i.e. rest areas, sports facilities, restrooms, etc) |

☐ Compare the two evaluation items by checking (✓) depending on the importance relative to each other

| Evaluation item             | Importance |   |   |   |   |   |   |   |   | Equally Important | Importance |   |   |   |   |   |   |   |  | Evaluation item |
|-----------------------------|------------|---|---|---|---|---|---|---|---|-------------------|------------|---|---|---|---|---|---|---|--|-----------------|
| Accessibility to the public | ⑨          | ⑧ | ⑦ | ⑥ | ⑤ | ④ | ③ | ② | ① |                   | ②          | ③ | ④ | ⑤ | ⑥ | ⑦ | ⑧ | ⑨ |  | Social benefits |

## 4 Evaluation of relative importance of sub indices for Ecological efficiency

| Index                 | Item                  | Sub-indices                                                                |
|-----------------------|-----------------------|----------------------------------------------------------------------------|
| Ecological efficiency | Algal bloom           | Status of green algae occurrence                                           |
|                       | Aquatic habitat       | Fish habitat, other living organisms (i.e. plants, benthic organisms, etc) |
|                       | Terrestrial ecosystem | Plants, terrestrial and aerial animals                                     |

☐ Compare the two evaluation items by checking (✓) depending on the importance relative to each other

| Evaluation item       | Importance |   |   |   |   |   |   |   | Equally Important | Importance |   |   |   |   |   |   |   | Evaluation item       |
|-----------------------|------------|---|---|---|---|---|---|---|-------------------|------------|---|---|---|---|---|---|---|-----------------------|
| Algal bloom           | ⑨          | ⑧ | ⑦ | ⑥ | ⑤ | ④ | ③ | ② | ①                 | ②          | ③ | ④ | ⑤ | ⑥ | ⑦ | ⑧ | ⑨ | Aquatic habitat       |
| Aquatic habitat       | ⑨          | ⑧ | ⑦ | ⑥ | ⑤ | ④ | ③ | ② | ①                 | ②          | ③ | ④ | ⑤ | ⑥ | ⑦ | ⑧ | ⑨ | Terrestrial ecosystem |
| Terrestrial ecosystem | ⑨          | ⑧ | ⑦ | ⑥ | ⑤ | ④ | ③ | ② | ①                 | ②          | ③ | ④ | ⑤ | ⑥ | ⑦ | ⑧ | ⑨ | Terrestrial ecosystem |

## 5 Evaluation of relative importance of sub indices for Operation and landscape management efficiency

| Index                                         | Item                      | Sub-indices                                                                  |
|-----------------------------------------------|---------------------------|------------------------------------------------------------------------------|
| Operation and landscape management efficiency | Slope protection          | Slope erosion, embankment protection, etc.                                   |
|                                               | Plant management          | Removal of dead plants, landscaping and water management, weed control, etc. |
|                                               | Sediment/waste management | Sediment management, soil dredging, waste management                         |
|                                               | Facility maintenance      | Deck management, trail maintenance, amusement facilities management, etc.    |
|                                               | Odor control              | Occurrence of foul odor                                                      |

☐ Compare the two evaluation items by checking (✓) depending on the importance relative to each other.

| Evaluation item           | Importance |   |   |   |   |   |   |   | Equally Important | Importance |   |   |   |   |   |   |   | Evaluation item           |
|---------------------------|------------|---|---|---|---|---|---|---|-------------------|------------|---|---|---|---|---|---|---|---------------------------|
| Slope protection          | ⑨          | ⑧ | ⑦ | ⑥ | ⑤ | ④ | ③ | ② | ①                 | ②          | ③ | ④ | ⑤ | ⑥ | ⑦ | ⑧ | ⑨ | Plant management          |
| Slope protection          | ⑨          | ⑧ | ⑦ | ⑥ | ⑤ | ④ | ③ | ② | ①                 | ②          | ③ | ④ | ⑤ | ⑥ | ⑦ | ⑧ | ⑨ | Sediment/waste management |
| Slope protection          | ⑨          | ⑧ | ⑦ | ⑥ | ⑤ | ④ | ③ | ② | ①                 | ②          | ③ | ④ | ⑤ | ⑥ | ⑦ | ⑧ | ⑨ | Facility maintenance      |
| Slope protection          | ⑨          | ⑧ | ⑦ | ⑥ | ⑤ | ④ | ③ | ② | ①                 | ②          | ③ | ④ | ⑤ | ⑥ | ⑦ | ⑧ | ⑨ | Odor control              |
| Plant management          | ⑨          | ⑧ | ⑦ | ⑥ | ⑤ | ④ | ③ | ② | ①                 | ②          | ③ | ④ | ⑤ | ⑥ | ⑦ | ⑧ | ⑨ | Sediment/waste management |
| Plant management          | ⑨          | ⑧ | ⑦ | ⑥ | ⑤ | ④ | ③ | ② | ①                 | ②          | ③ | ④ | ⑤ | ⑥ | ⑦ | ⑧ | ⑨ | Facility maintenance      |
| Plant management          | ⑨          | ⑧ | ⑦ | ⑥ | ⑤ | ④ | ③ | ② | ①                 | ②          | ③ | ④ | ⑤ | ⑥ | ⑦ | ⑧ | ⑨ | Odor control              |
| Sediment/waste management | ⑨          | ⑧ | ⑦ | ⑥ | ⑤ | ④ | ③ | ② | ①                 | ②          | ③ | ④ | ⑤ | ⑥ | ⑦ | ⑧ | ⑨ | Facility maintenance      |
| Sediment/waste management | ⑨          | ⑧ | ⑦ | ⑥ | ⑤ | ④ | ③ | ② | ①                 | ②          | ③ | ④ | ⑤ | ⑥ | ⑦ | ⑧ | ⑨ | Odor control              |
| Facility maintenance      | ⑨          | ⑧ | ⑦ | ⑥ | ⑤ | ④ | ③ | ② | ①                 | ②          | ③ | ④ | ⑤ | ⑥ | ⑦ | ⑧ | ⑨ | Odor control              |
